# Supplementary material
Source: Springer Nature journal article supplement (https://www.springermedizin.de/resource/supplementary/13024_2012_355_MOESM13_ESM.pdf/9643838)

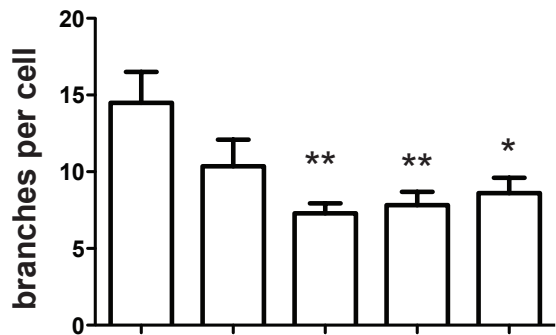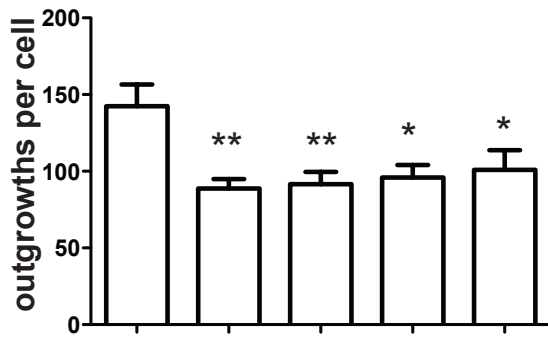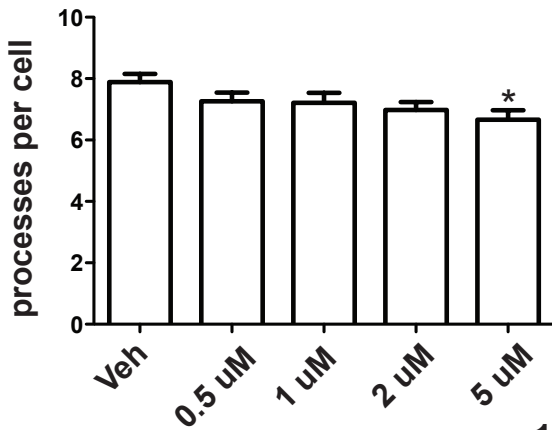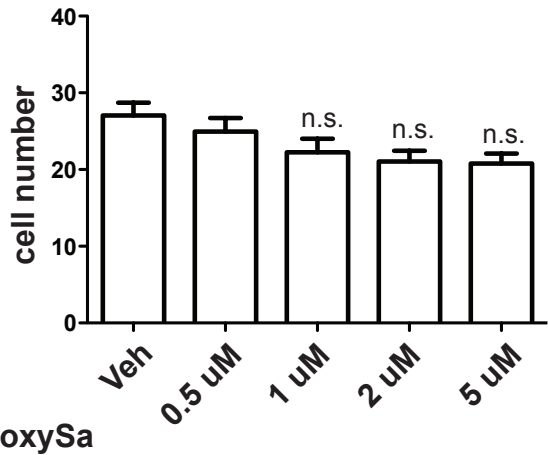

1-DeoxySa

Supplement: MOESM13 [file 9643838]
